# Supplementary material
Source: publisher site journal article supplement (https://www.dovepress.com/article/442598)
Supplement: Supplementary file 1 [file get_supplementary_file.php]

Supplementary Table 1. Characteristics between DIC patients with or without NTIS.

| **Characteristics** | **Total n = 388** | **With NTIS n = 224** | **Without NTIS n = 164** | **p value** |
| --- | --- | --- | --- | --- |
| **Age, years** | 71(60-81) | 72(62-82) | 69(57-81) | 0.059 |
| **Sex (male%)** | 221(57.0) | 130(58.0) | 91(55.5) | 0.617 |
| **Comorbidities** |  |  |  |  |
| **Hypertension** | 175(45.1) | 100(44.6) | 75(45.7) | 0.831 |
| **Diabetes** | 131(33.8) | 82(36.6) | 49(29.9) | 0.166 |
| **Chronic kidney diseases** | 96(24.7) | 49(21.9) | 47(28.7) | 0.126 |
| **Infection sources** |  |  |  |  |
| **Respiratory system** | 254(65.5) | 165(73.7) | 89(54.3) | <0.001* |
| **Gastrointestinal tract** | 103(26.5) | 44(19.6) | 59(36.0) | <0.001* |
| **Urogenital tract** | 81(20.9) | 48(21.4) | 33(20.1) | 0.754 |
| **Others** | 60(15.5) | 35(15.6) | 25(15.2) | 0.918 |
| **Laboratory indicators** |  |  |  |  |
| **White blood cell, ×109/L** | 10.4(6.8-15.6) | 10.5(7.3-15.9) | 9.9(6.1-14.3) | 0.055 |
| **Alanine aminotransferase, IU/L** | 35(19-90) | 33(17-91) | 36(20-89) | 0.901 |
| **Total bilirubin, μmol/L** | 16.6(10.5-29.4) | 17.1(11.1-31.4) | 15.6(10.0-24.8) | 0.04* |
| **Creatinine, μmol/L** | 102(67-186) | 120(71-218) | 83(62-148) | 0.004* |
| **Lactate, mmol/L** | 1.8(1.3-2.6) | 1.8(1.4-2.9) | 1.9(1.3-2.6) | 0.843 |
| **C-reactive protein, mg/L** | 126(58-166) | 128(59-186) | 124(57-160) | 0.058 |
| **Procalcitonin, ng/mL** | 4.6(0.6-34.9) | 4.8(0.9-37.5) | 4.0(0.5-26.6) | 0.737 |
| **FT3, pmol/L** | 2.1(1.6-2.7) | 1.7(1.5-2.0) | 2.8(2.5-3.2) | <0.001* |
| **FT4, pmol/L** | 12.1(10.3-14.2) | 11.4(9.4-13.0) | 13.7(11.7-15.5) | <0.001* |
| **TSH, μIU/mL** | 0.9(0.4-1.8) | 0.8(0.3-1.3) | 1.3(0.6-2.4) | 0.016* |
| **Coagulation parameters** |  |  |  |  |
| **Platelet count,×109/L** | 85(58-134) | 91(54-152) | 81(60-108) | 0.413 |
| **Fibrinogen, g/L** | 4.0(2.9-5.1) | 3.9(2.8-5.1) | 4.1(3.2-5.0) | 0.91 |
| **FDP, mg/L** | 22.2(13.3-41.2) | 24.6(15.0-43.9) | 19.8(10.4-36.2) | 0.493 |
| **D-dimers, mg/L** | 6.4(2.8-11.4) | 7.2(3.9-12.2) | 5.7(1.8-10.1) | 0.29 |
| **PT, seconds** | 14(13-16) | 15(13-16) | 13(12-15) | 0.058 |
| **APTT, seconds** | 33(29-38) | 35(29-40) | 32(29-36) | 0.029* |
| **INR** | 1.2(1.1-1.4) | 1.2(1.1-1.4) | 1.2(1.1-1.3) | 0.126 |
| **APACHEII score** | 13(9-19) | 15(10-21) | 11(9-17) | <0.001* |
| **28 days mortality** | 75(19.3) | 52(23.2) | 23(14.0) | 0.024* |
| Data are presented as median and interquartile range, or number (percentage). DIC, disseminated intravascular coagulation; NTIS, nonthyroidal illness syndrome; FT3, free triiodothyronine; FT4, free thyroxine; TSH, thyroid stimulating hormone; FDP, fibrin/fibrinogen degradation products; PT, prothrombin time; APTT, activated partial thromboplastin time;INR, international normalized ratio; APACHE II, Acute Physiology and Chronic Health Evaluation II. *p < 0.05.  Supplementary Table 2. Analysis of risk factors for DIC in sepsis using logistic regression models on raw data.   |  | **Univariate logistic model** | | **Multivariate logistic mode1** | | | --- | --- | --- | --- | --- | | **Variables** | **OR (95%CI)** | **p value** | **OR (95%CI)** | **p value** | | **Age** | 0.996(0.989-1.004) | 0.377 | 0.996(0.986-1.005) | 0.403 | | **Sex** | 0.78(0.61-0.99) | 0.046 | 0.73(0.55-0.98) | 0.034* | | **Hypertension** | 0.77(0.60-0.98) | 0.037 | 0.71(0.53-0.95) | 0.023* | | **Diabetes** | 0.97(0.75-1.25) | 0.882 |  |  | | **Chronic kidney diseases** | 1.39(1.04-1.85) | 0.025 | 1.06(0.72-1.54) | 0.776 | | **Infection sources** |  |  |  |  | | **Respiratory system** | 0.98(0.76-1.26) | 0.901 |  |  | | **Gastrointestinal tract** | 0.96(0.73-1.26) | 0.778 |  |  | | **Urogenital tract** | 1.02(0.76-1.38) | 0.866 |  |  | | **Others** | 1.60(1.12-2.29) | 0.009 | 1.72(1.13-2.59) | 0.010* | | **White blood cell** | 1.014(0.997-1.031) | 0.095 | 0.976(0.956-0.996) | 0.025* | | **Alanine aminotransferase** | 1.001(1.001-1.002) | <0.001 | 1.001(1.001-1.002) | <0.001* | | **Total bilirubin** | 1.003(0.999-1.006) | 0.093 | 0.999(0.995-1.002) | 0.622 | | **Creatinine** | 1.003(1.002-1.004) | <0.001 | 1.002(1.001-1.003) | <0.001* | | **Lactate** | 1.009(0.973-1.046) | 0.614 |  |  | | **C-reactive protein** | 1.004(1.002-1.005) | <0.001 | 1.001(0.999-1.003) | 0.230 | | **Procalcitonin** | 1.020 (1.015-1.025) | <0.001 | 1.019(1.014-1.025) | <0.001* | | **APACHEII score** | 1.053(1.034-1.072) | <0.001 | 1.023(0.999-1.047) | 0.054 | | **Thyroidal dysfunctions** |  |  |  |  | | **Eythyroid** | 1(ref.) |  | 1(ref.) |  | | **Hypothyroidism** | 0.58(0.31-1.08) | 0.0865 | 0.66(0.27-1.43) | 0.321 | | **Hyperthyroidism** | 1.03(0.51-2.07) | 0.936 | 1.40(0.59-3.12) | 0.419 | | **NTIS** | 3.52(2.74-4.53) | <0.001 | 3.18(2.28-4.45) | <0.001* | | **Others** | 0.69(0.48-1.00) | 0.055 | 0.99(0.61-1.59) | 0.996 | | OR, odds ratio; DIC, disseminated intravascular coagulation; APACHE II, Acute Physiology and Chronic Health Evaluation II; NTIS, nonthyroidal illness syndrome.  *p < 0.05. | | | | |   Supplementary Table 3. Impact of NTIS on the 28 days mortality in septic patients with DIC estimated using modified Poisson regression models on raw data.   |  | **RR (CI)** | **p value** | | --- | --- | --- | | **With NTIS vs without NTIS** |  |  | | **Crude** | 1.45 (1.24-1.70) | <0.001* | | **Model 1** | 1.46 (1.25-1.70) | <0.001* | | **Model 2** | 1.38 (1.13-1.69) | 0.001* | | **Model 3** | 1.16 (1.03-1.39) | 0.044* | | Data are presented as relative risk (RR) and 95% confidence intervals. DIC, disseminated intravascular coagulation; NTIS, nonthyroidal illness syndrome. Model 1 adjusted for age, sex, and comorbidities (hypertension, diabetes, and chronic kidney diseases).  Model 2 adjusted for model 1, plus total bilirubin, creatinine, lactate, C-reactive protein, and procalcitonin. Model 3 adjusted for model 2, plus APACHE II score. *p < 0.05. | | |   Supplementary Figure 1. Survival curve between septic patients with or without DIC.  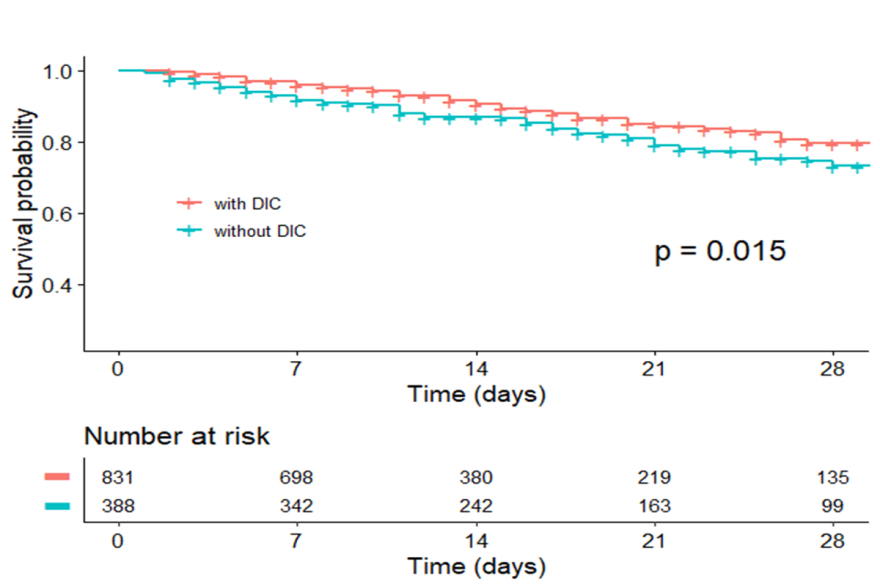 | | | | |
